# Supplementary material for: Correlations between the structure and the vibrational spectrum of the phosphate group. Implications for the analysis of an important functional group in phosphoproteins
Source: Royal Society of Chemistry journal article supplement (doi:10.1039/c9ra10366j), 2020-01-01
Supplement: c9ra10366j1.pdf [file c9ra10366j1.pdf]

## Electronic Supplementary Information

# Correlations between the structure and the vibrational spectrum of the phosphate group. Implications for the analysis of an important functional group in phosphoproteins.

Pontus Pettersson, and Andreas Barth\*

Department of Biochemistry and Biophysics, Stockholm University, Sweden

\* corresponding author, email: [barth@dbb.su.se](mailto:barth@dbb.su.se)

### Correlations between vibrational spectrum and phosphate bond angles

Tables S1 to S3 list the properties of correlations between the O—P—O bond angles and the wavenumbers of the P—O<sub>T</sub> stretching vibrations. As indicated by the  $R^2$  values listed in Table S1, the O<sub>B</sub>—P—O<sub>T</sub> angles correlate best with the average wavenumber of the asymmetric vibrations, whereas two of the O<sub>T</sub>—P—O<sub>T</sub> angles correlate best with a specific asymmetric vibration. The fundamental wavenumber never provides the best correlation. The splitting of the two asymmetric P—O<sub>T</sub> stretching vibrations does not correlate with any of the angles, the  $R^2$  values are mostly below 0.1. No correlations exist between the P—O stretching vibrations and the C—O<sub>B</sub>—P angle. A comparison with the  $R^2$  values in Table 1 of the main text reveals that the bond angles are less well predicted than most of the P—O bond length parameters.

**Table S1.** Correlations between phosphate bond angles and vibrational spectrum.  $R^2$  is the coefficient of determination, Min, Mean and Max indicate smallest, average and largest angle or wavenumber.  $\tilde{\nu}_{as}$  indicates the wavenumber of an asymmetric P—O<sub>T</sub> stretching vibration.  $\tilde{\nu}_f$  is the fundamental wavenumber<sup>18</sup> defined as  $\tilde{\nu}_f = [(\tilde{\nu}_{as1}^2 + \tilde{\nu}_{as2}^2 + \tilde{\nu}_s^2)/3]^{1/2}$ , where  $\tilde{\nu}_{as1}$  and  $\tilde{\nu}_{as2}$  are the wavenumbers of the two asymmetric stretching vibrations and  $\tilde{\nu}_s$  the wavenumber of the symmetric stretching vibration. The best correlations are indicated by  $R^2$  values in bold print.

| Angle                                 | $R^2$ for correlation with       |                                   |                                  |                 |
|---------------------------------------|----------------------------------|-----------------------------------|----------------------------------|-----------------|
|                                       | Min<br>$\tilde{\nu}_{as}(P-O_T)$ | Mean<br>$\tilde{\nu}_{as}(P-O_T)$ | Max<br>$\tilde{\nu}_{as}(P-O_T)$ | $\tilde{\nu}_f$ |
| Min O <sub>B</sub> —P—O <sub>T</sub>  | 0.24                             | <b>0.51</b>                       | 0.47                             | 0.41            |
| Mean O <sub>B</sub> —P—O <sub>T</sub> | 0.36                             | <b>0.61</b>                       | 0.48                             | 0.46            |
| Max O <sub>B</sub> —P—O <sub>T</sub>  | 0.27                             | <b>0.33</b>                       | 0.19                             | 0.21            |
| Min O <sub>T</sub> —P—O <sub>T</sub>  | <b>0.63</b>                      | 0.53                              | 0.19                             | 0.39            |
| Mean O <sub>T</sub> —P—O <sub>T</sub> | 0.38                             | <b>0.64</b>                       | 0.50                             | 0.48            |
| Max O <sub>T</sub> —P—O <sub>T</sub>  | 0.16                             | 0.56                              | <b>0.66</b>                      | 0.44            |

Figure S1 shows the best correlations between angles and P—O<sub>T</sub> wavenumbers, Table S2 provides additional properties and Table S3 lists their parameters for the fitted linear equations. According to Table S2, the standard deviation of the bond angles from the trend line is smaller for the O<sub>T</sub>—P—O<sub>T</sub> angles than for the O<sub>B</sub>—P—O<sub>T</sub> angles. Of the latter, the mean O<sub>B</sub>—P—O<sub>T</sub> angle has the lowest standard deviation and the highest  $R^2$ .

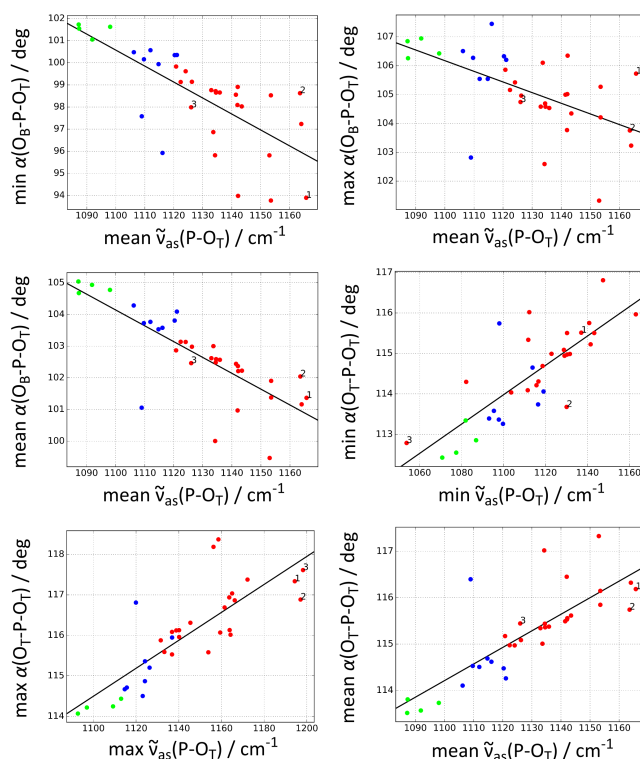

**Figure S1.** The best correlations between P—O<sub>T</sub> stretching vibrations and O—P—O angles. Red: acetyl phosphate, green: methyl phosphate, blue: polytolyl phosphate. The three acetyl phosphate models for the catalytic site of the Ca<sup>2+</sup>-ATPase are numbered (see Discussion of the main text). For further explanations, see the heading of Table S1.

**Table S2.** Correlations between bond angles and wavenumber of vibration.  $\alpha$  range is the range of bond angles found in our models,  $\Delta\alpha$  is the difference between the largest and the smallest angle in the models,  $STD(\alpha)$  is the standard deviation of the bond angle values from the trend line,  $STD(\alpha)/\Delta\alpha$  is a measure of the quality of the prediction, vibration is the vibration used for the correlation. See Table S1 for further explanations.

| Bond angle       | $\alpha$ range / deg | $STD(\alpha)$ / deg | $STD(\alpha) / \Delta\alpha$ | Vibration                      |
|------------------|----------------------|---------------------|------------------------------|--------------------------------|
| Min $O_B-P-O_T$  | 93.77-101.73         | 1.5                 | 0.19                         | Mean $\tilde{\nu}_{as}(P-O_T)$ |
| Mean $O_B-P-O_T$ | 99.47-105.04         | 0.8                 | 0.15                         | Mean $\tilde{\nu}_{as}(P-O_T)$ |
| Max $O_B-P-O_T$  | 101.33-107.45        | 1.1                 | 0.18                         | Mean $\tilde{\nu}_{as}(P-O_T)$ |
| Min $O_T-P-O_T$  | 112.43-116.81        | 0.7                 | 0.15                         | Min $\tilde{\nu}_{as}(P-O_T)$  |
| Mean $O_T-P-O_T$ | 113.51-117.33        | 0.6                 | 0.15                         | Mean $\tilde{\nu}_{as}(P-O_T)$ |
| Max $O_T-P-O_T$  | 114.07-118.37        | 0.7                 | 0.15                         | Max $\tilde{\nu}_{as}(P-O_T)$  |

**Table S3.** Linear correlations between wavenumber and bond angle. The data were fitted with a line  $\alpha = c\tilde{\nu} + d$ , where  $\alpha$  is the bond angle in deg,  $\tilde{\nu}$  the wavenumber in  $cm^{-1}$ ,  $c$  the slope in deg·cm and  $d$  the intercept in deg. The correlations are applicable in the intervals given in Table S2 for each bond angle.

| Bond angle       | $c$ / deg cm           | $d$ / deg | Vibration                      |
|------------------|------------------------|-----------|--------------------------------|
| Min $O_B-P-O_T$  | $-7.22 \times 10^{-2}$ | 180.0     | Mean $\tilde{\nu}_{as}(P-O_T)$ |
| Mean $O_B-P-O_T$ | $-5.00 \times 10^{-2}$ | 159.1     | Mean $\tilde{\nu}_{as}(P-O_T)$ |
| Max $O_B-P-O_T$  | $-3.69 \times 10^{-2}$ | 146.8     | Mean $\tilde{\nu}_{as}(P-O_T)$ |
| Min $O_T-P-O_T$  | $3.62 \times 10^{-2}$  | 74.1      | Min $\tilde{\nu}_{as}(P-O_T)$  |
| Mean $O_T-P-O_T$ | $3.58 \times 10^{-2}$  | 74.9      | Mean $\tilde{\nu}_{as}(P-O_T)$ |
| Max $O_T-P-O_T$  | $3.45 \times 10^{-2}$  | 76.5      | Max $\tilde{\nu}_{as}(P-O_T)$  |
